# Supplementary material for: Fabrication of Mn/P co-doped hollow tubular carbon nitride by a one-step hydrothermal–calcination method for the photocatalytic degradation of organic pollutants
Source: Royal Society of Chemistry journal article supplement (doi:10.1039/d2cy01107g), 2022-01-01
Supplement: d2cy01107g1.pdf [file d2cy01107g1.pdf]

# Supplementary Material

1  
2  
3  
4  
5  
6  
7  
8  
9  
10  
11  
12  
13  
14  
15

## **Fabrication of Mn/P co-doping hollow tubular carbon nitride by one-step hydrothermal-calcining method for photocatalytic degradation of organic pollutants**

Dongbo Wang <sup>a,\*</sup>, Xiyuan Dong <sup>a</sup>, Ye Lei <sup>a</sup>, Changqing Lin <sup>b</sup>, Dan Huang <sup>b,\*</sup>, Xin Yu <sup>a</sup>, Xuan

Zhang<sup>a</sup>

<sup>a</sup>*Guangxi Cooperative Innovation Centre for Calcium-based Materials, School of Resources,*

*Environment and Materials, Guangxi University, Nanning 530004, PR China.*

<sup>b</sup>*School of Physical Science and Technology, Guangxi University Nanning 530004, PR China.*

*\*Corresponding author: [wangdongbo@gxu.edu.cn](mailto:wangdongbo@gxu.edu.cn) (Dongbo Wang), and [danhuang@gxu.edu.cn](mailto:danhuang@gxu.edu.cn)*

*(Dan Huang)*

*Address: School of Resources, Environment and Materials, Guangxi University, Nanning 530004,*

*PR China.*

16 The control experiment:

17 (1) Different 3Mn-PCN samples were prepared at different water heat treatment temperatures  
18 (160,180 and 200°C) for 6 h.

19 (2) Different 3Mn-PCN samples were made at 180°C by different water thermal treatment times  
20 (4 h, 6 h and 8 h).

21 (3) 2 g melamine, 2 mL H<sub>3</sub>PO<sub>4</sub> and 50 mL deionized water were mixed and stirred for 6h,  
22 followed by centrifuging (4000 r), washing with ethanol absolute and deionized water, drying in  
23 60°C oven, and calcining for 4 h in 550°C. Then, we obtained white powder, labeling it as PCN\*,  
24 which was prepared in the same material proportion as PCN but without hydrothermal process.

25

26 The influence of hydrothermal treatment temperature on the photocatalytic performance of Mn-  
27 PCN is analyzed (**Fig. S1a**). When the temperature is 160°C, Mn-PCN is not hollow morphology  
28 (**Fig. S2a**). Moreover, Mn-PCN tubular breaks when the temperature is 200°C (**Fig. S2b**), then the  
29 adsorption capacity strengthens, but the photocatalytic performance decreased. Therefore, the  
30 photocatalytic performance of Mn-PCN in a suitable temperature(180°C) is the best. The influence  
31 of hydrothermal treatment time on the photocatalytic performance of Mn-PCN was explored (**Fig.**  
32 **S1b**). When the time is 4 h, some parts of Mn-PCN are not yet hexagonal tubular (**Fig. S3a**).  
33 Furthermore, the tubular surface structure exist large holes after hydrothermal treatment for 8 h (**Fig.**  
34 **S3b**), which is not conducive to the surface material transfer. The results displays that 6 h is the most  
35 appropriate time for hydrothermal treatment. Therefore, the samples prepared under 180°C for 6 h  
36 were selected for characterization and further exploration in manuscript.

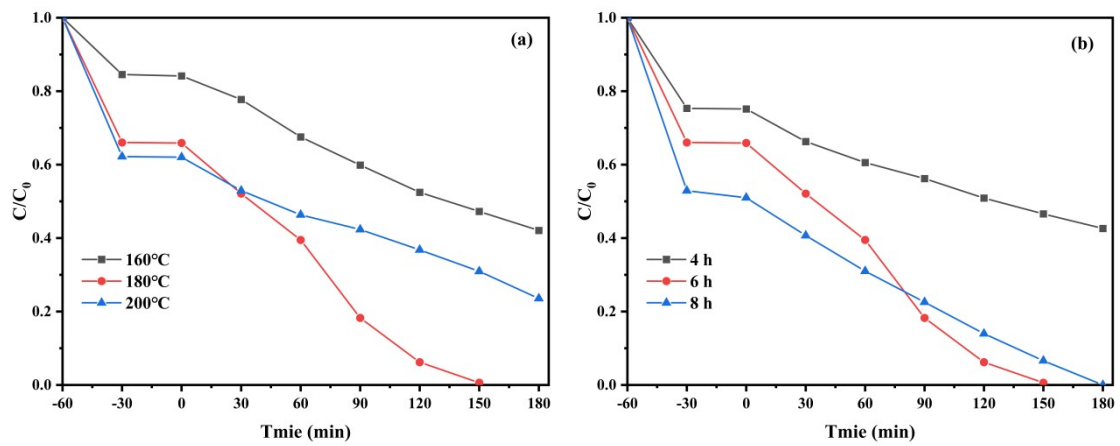

37

38 **Fig. S1.** Effect of hydrothermal treatment (a) temperature and (b) time on photocatalytic

39

degradation of RhB by Mn-PCN.

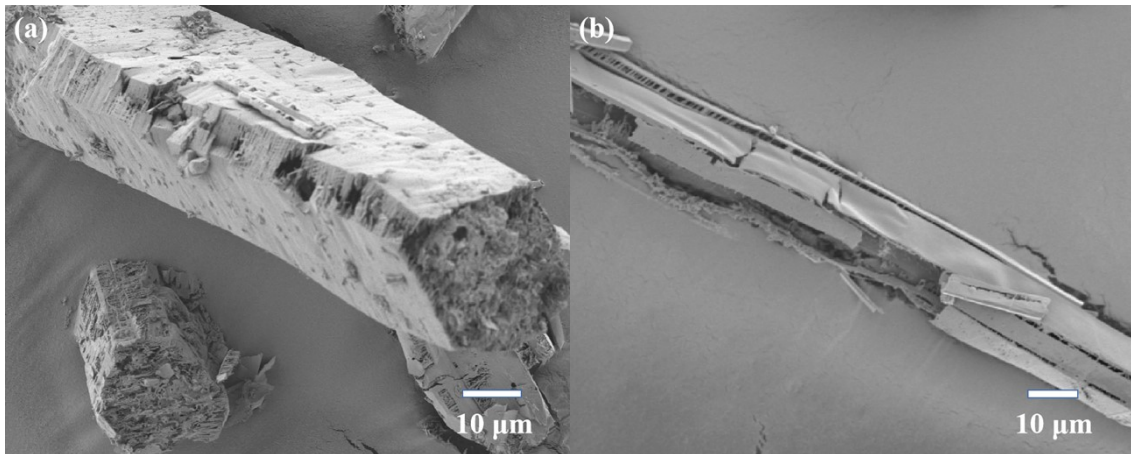

40

41 **Fig. S2.** SEM images of Mn-PCN prepared by hydrothermal treatment in (a) 160°C and (b) 200°C

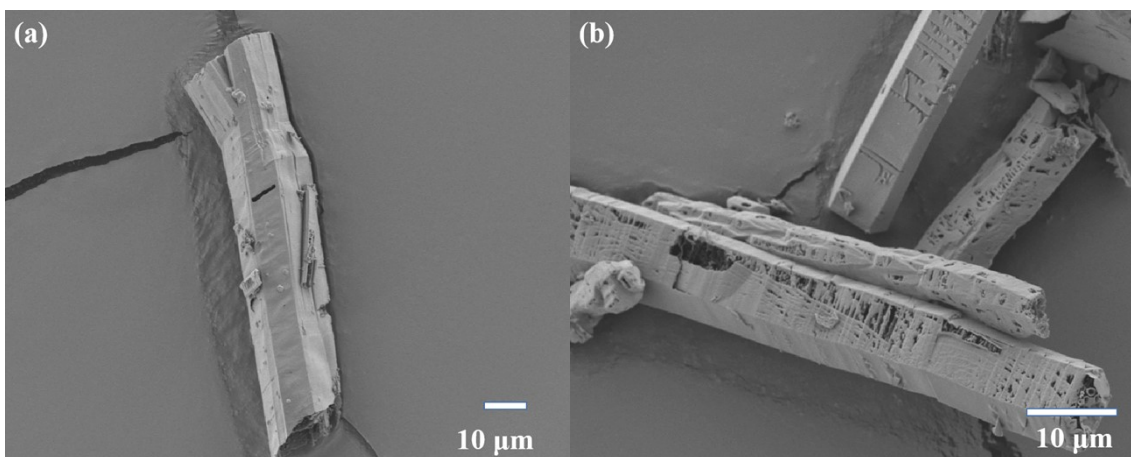

42

43 **Fig. S3.** SEM images of Mn-PCN prepared by hydrothermal treatment for (a) 4 h and (b) 8 h

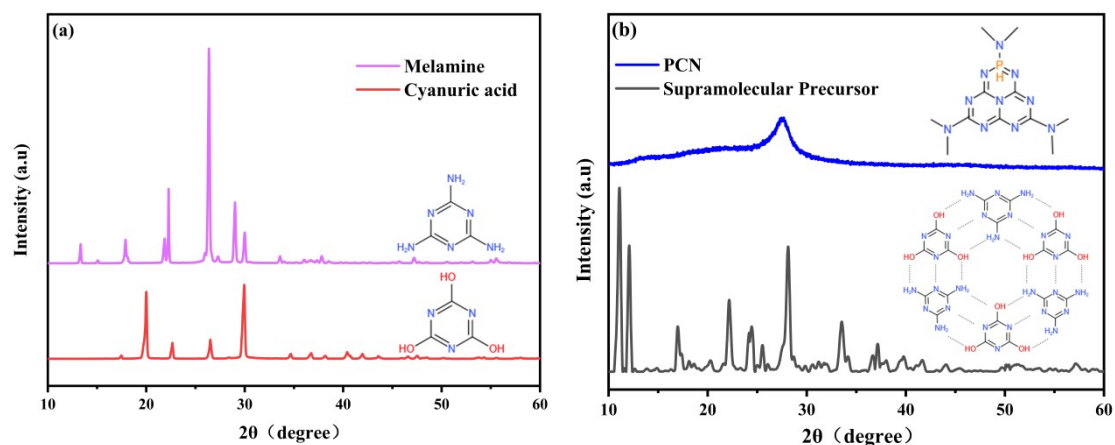

44

45 **Fig. S4.** XRD patterns of (a) melamine and cyanuric acid, (b) PCN precursor and PCN

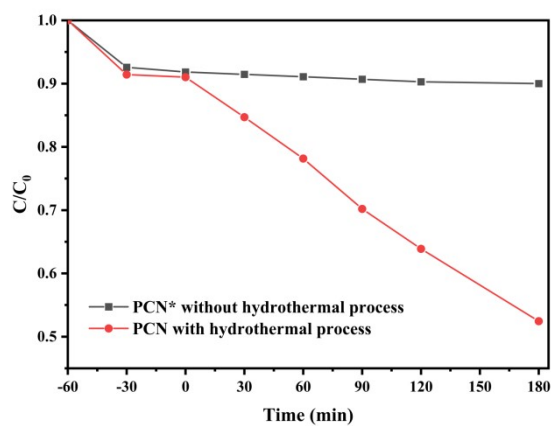

46

47 **Fig. S5.** the comparison of the photocatalytic properties of PCN and PCN\*

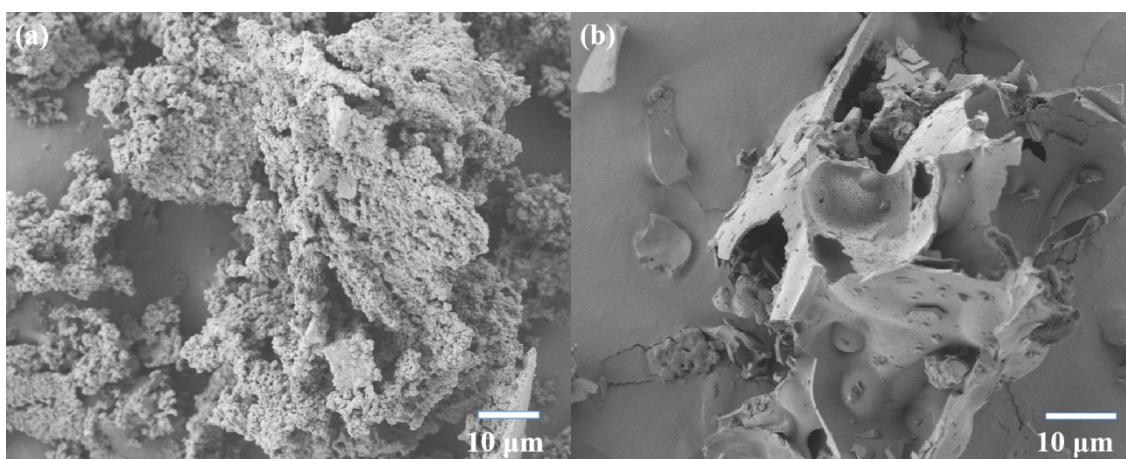

48

49 **Fig. S6.** SEM images of (a) precursor of PCN\*, and (b) PCN\*

50

In Fig. S7, it can be clearly seen that the acidity and alkalinity of RhB solution exerts no

51 significant influence on degradation rate, suggesting that the 3Mn-PCN is effective for degrade at a  
52 wide pH range, which implies that it is feasible over Mn-PCN for the treatment of organic  
53 contaminates.

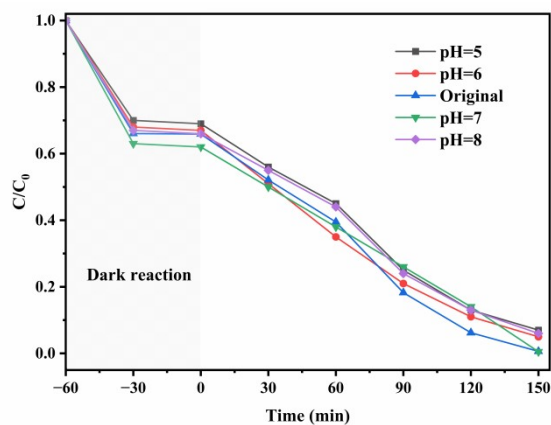

54

55 Fig. S7 The effect of solution pH on the degradation kinetics for RhB with 3Mn-PCN
